# Supplementary material for: Branch-and-Price for the Pickup and Delivery Problem with Time Windows and Scheduled Lines
Source: Atypon-hosted journal article supplement (doi:10.1287/trsc.2017.0798), 2018-06-29
Supplement: trsc.2017.0798-sm.pdf [file trsc.2017.0798-sm.pdf]

## Appendix.

### Details on the Backward Labeling Algorithm

In the backward labeling algorithm, labels are extended from the sink (i.e.,  $o(v')$ ) to its predecessors. It is similar to the forward labeling algorithm. To a backward label  $L_b$ , we associate the following data:

- $\eta$  last node of the path;
- $t$  departure time from the node;
- $q$  total load after visiting the last node;
- $c$  accumulated cost;
- $\mathcal{O}$  set of requests that have been finished, but not started (i.e., the request has been delivered either to the delivery node or to a transfer node, but not picked up from its pickup or transfer node);
- $\mathcal{C}$  set of completed requests;
- $\mathcal{O}^T$  set of finished requests at a transfer node, such that  $\mathcal{O}^T \subseteq \mathcal{O}$ .

Similarly to forward labeling, the resources are  $t$ ,  $q$ ,  $c$ ,  $\mathcal{O}$ ,  $\mathcal{O}^T$ , and  $\mathcal{C}$ . These are initialized as follows:  $t = u_{o(v)}$ ,  $q = Q_v$ ,  $c = 0$ , and  $\mathcal{O} \equiv \mathcal{O}^T \equiv \mathcal{C} \equiv \emptyset$ .

When extending a backward label  $L_b$  along an arc  $(j, \eta_{L_b})$ , the extension is feasible only if:

$$t_{L_b} - s_{\eta_{L_b}} - t_{j, \eta_{L_b}} \geq l_j + s_j \quad (1)$$

$$q_{L_b} + d_j \geq 0. \quad (2)$$

In this case, we ensure the capacity constraints. Similarly to forward labeling, time windows are used to eliminate infeasible extensions. Moreover,  $L_b$  and  $j$  must also satisfy one of the following five conditions, which ensure that the extension is compatible with the sets  $\mathcal{O}$ ,  $\mathcal{O}^T$  and  $\mathcal{C}$ :

$$j \in \mathcal{D} \wedge j - n \notin \mathcal{O}_{L_b} \wedge j - n \notin \mathcal{C}_{L_b} \quad (3)$$

$$j \in \mathcal{P} \wedge j \in \mathcal{O}_{L_b} \quad (4)$$

$$j \in \mathcal{T} \wedge r(j) \notin \mathcal{O}_{L_b} \wedge r(j) \notin \mathcal{C}_{L_b} \quad (5)$$

$$j \in \mathcal{T} \wedge r(j) \in \mathcal{O}_{L_b} \setminus \mathcal{O}_{L_b}^T \wedge r(j) \notin \mathcal{C}_{L_b} \quad (6)$$

$$j = o(v) \wedge \mathcal{O}_{L_b} \in \emptyset. \quad (7)$$

Condition (3) states that visiting a delivery node  $j \in \mathcal{D}$  is feasible if the corresponding request  $j - n$  has not been delivered at the delivery node, nor at a transfer node earlier in the partial path, and this specific request is not completed. Expression (4) implies that extending the label to a pickup node  $j \in \mathcal{P}$  is feasible if  $j$  has already been delivered to its delivery node, or to a transfer node in the partial path. Condition (5) states that visiting a transfer node  $j \in \mathcal{T}$  is feasible if the corresponding request  $r(j) \in \mathcal{P}$  has not been delivered to its delivery node, or to a transfer node in the partial path, and if this request has not been completed. Expression (6) states that extending to a transfer node  $j \in \mathcal{T}$  is feasible if the corresponding request  $r(j) \in \mathcal{P}$  has been delivered to its delivery node, and not to a transfer node, and if this request has not been completed in the partial path. Finally, condition (7) implies that a partial path cannot be ended at the origin depot (i.e.,  $o(v)$ ), if at least one request is delivered, but not picked up (from the origin, or from a transfer node) in the partial path.

When label  $\eta_{L_b}$  and node  $j$  satisfy the conditions (1) and (2), along with one of the following conditions, the corresponding updates on sets  $\mathcal{O}$ ,  $\mathcal{O}^T$  and  $\mathcal{C}$  are performed as follows:

- expression (3):  $\mathcal{O}_{L_b} \leftarrow \mathcal{O}_{L_b} \cup \{j - n\}$ ;
- expression (4):  $\mathcal{C}_{L_b} \leftarrow \mathcal{C}_{L_b} \cup \{j\}$ ,  $\mathcal{O}_{L_b} \leftarrow \mathcal{O}_{L_b} \setminus \{j\}$ , and  $\mathcal{O}_{L_b}^T \leftarrow \mathcal{O}_{L_b}^T \setminus \{j\}$ ;
- expression (5):  $\mathcal{O}_{L_b} \leftarrow \mathcal{O}_{L_b} \cup \{r(j)\}$  and  $\mathcal{O}_{L_b}^T \leftarrow \mathcal{O}_{L_b}^T \cup \{r(j)\}$ ;
- expression (6):  $\mathcal{C}_{L_b} \leftarrow \mathcal{C}_{L_b} \cup \{r(j)\}$  and  $\mathcal{O}_{L_b} \leftarrow \mathcal{O}_{L_b} \setminus \{r(j)\}$ ;
- expression (7).

The dominance condition used in the backward label setting algorithm is the following: a label  $L_b^1$  dominates a label  $L_b^2$  if conditions (1) and (3)–(5) (from Section 4.1.2 of the article) are satisfied, along with the following condition:

$$t_{L_b^1} \geq t_{L_b^2}. \quad (8)$$

The proof is similar to that given for the forward dominance test.

Table 1 reports detailed results concerning the performance of the bi-directional and the mono-directional labeling algorithms. Columns “ $\underline{z}$ ” and “ $\bar{z}$ ” provide the best lower and upper bounds found within the imposed time limit, and “Time” provides the time needed to solve an instance.

**Table 1 Comparison between Bi-directional and Mono-directional Algorithms.**

| Instance  | Mono-directional |           |            | Bi-directional  |           |            |
|-----------|------------------|-----------|------------|-----------------|-----------|------------|
|           | $\underline{z}$  | $\bar{z}$ | Time (sec) | $\underline{z}$ | $\bar{z}$ | Time (sec) |
| C6_2.4    | 369.36           | 369.36    | 0          | 369.36          | 369.36    | 0          |
| C7_2.4    | 390.31           | 390.31    | 0          | 390.31          | 390.31    | 0          |
| C8_2.4    | 446.35           | 446.35    | 3          | 446.35          | 446.35    | 21         |
| C9_2.4    | 471.16           | 471.16    | 178        | 471.16          | 471.16    | 146        |
| C10_2.4   | 510.01           | 510.01    | 73         | 510.01          | 510.01    | 55         |
| C11_2.4   | 522.85           | 522.85    | 37         | 522.85          | 522.85    | 27         |
| C12_2.4   | 541.60           | 541.60    | 4          | 541.60          | 541.60    | 4          |
| C15_2.6   | 649.93           | 649.93    | 32         | 649.93          | 649.93    | 21         |
| C20_2.8   | 751.23           | 751.23    | 79         | 751.23          | 751.23    | 69         |
| C25_2.8   | 879.94           | 879.94    | 2,627      | 879.94          | 879.94    | 1,215      |
| C40_2.8   | –                | –         | 10,800     | 1,202.13        | –         | 10,800     |
| RC6_2.4   | 572.76           | 572.76    | 0          | 572.76          | 572.76    | 0          |
| RC7_2.4   | 575.95           | 575.95    | 0          | 575.95          | 575.95    | 0          |
| RC8_2.4   | 585.32           | 585.32    | 0          | 585.32          | 585.32    | 1          |
| RC9_2.4   | 593.70           | 593.70    | 1          | 593.70          | 593.70    | 1          |
| RC10_2.4  | 599.95           | 599.95    | 1          | 599.95          | 599.95    | 1          |
| RC11_2.4  | 624.48           | 624.48    | 1          | 624.48          | 624.48    | 1          |
| RC12_2.6  | 662.03           | 662.03    | 1          | 662.03          | 662.03    | 1          |
| RC15_2.6  | 1,068.16         | 1,068.16  | 1          | 1,068.16        | 1,068.16  | 1          |
| RC20_2.8  | 1,200.36         | 1,200.36  | 3          | 1,200.36        | 1,200.36  | 3          |
| RC25_2.8  | 1,530.43         | 1,530.43  | 40         | 1,530.43        | 1,530.43  | 33         |
| RC40_2.12 | 1,969.45         | 1,969.45  | 1,063      | 1,969.45        | 1,969.45  | 682        |
| RC50_2.14 | 2,200.88         | 2,200.88  | 1,199      | 2,200.88        | 2,200.88  | 921        |
| RC60_2.16 | 2,636.18         | –         | 10,800     | 2636.22         | –         | 10,800     |
| R6_2.4    | 416.16           | 416.16    | 0          | 416.16          | 416.16    | 0          |
| R7_2.4    | 473.06           | 473.06    | 1          | 473.06          | 473.06    | 1          |
| R8_2.4    | 558.17           | 558.17    | 2          | 558.17          | 558.17    | 2          |
| R9_2.4    | 632.42           | 632.42    | 6          | 632.42          | 632.42    | 1          |
| R10_2.4   | 636.05           | 636.05    | 3          | 636.05          | 636.05    | 3          |
| R11_2.4   | 748.29           | 748.29    | 3          | 748.29          | 748.29    | 4          |
| R12_2.6   | 913.68           | 913.68    | 6          | 913.68          | 913.68    | 7          |
| R15_2.6   | 1,083.50         | 1,083.50  | 14         | 1,083.50        | 1,083.50  | 13         |
| R20_2.8   | 1,542.93         | 1,542.93  | 19         | 1,542.93        | 1,542.93  | 15         |
| R25_2.8   | 1,636.12         | 1,636.12  | 59         | 1,636.12        | 1,636.12  | 24         |
| R40_2.12  | 1,969.77         | 1,969.77  | 606        | 1,969.77        | 1,969.77  | 589        |
| R50_2.14  | 2,595.14         | 2,595.14  | 1,634      | 2,595.14        | 2,595.14  | 543        |
| R60_2.16  | 2,868.86         | –         | 10,800     | 2,871.13        | –         | 10,800     |
| Average   |                  |           | 226.35     |                 |           | 129.56     |

In Table 2, under columns “ $\underline{z}$ ” and “ $\bar{z}$ ” we indicate the best lower and upper bounds found within the time limit. The column titled “# via SLs” shows the number of demand units shipped on scheduled lines. In addition, “# of vehicles” indicates the number of vehicles used in the solutions. Finally, “Time” and “Savings” show the time needed to obtain a solution and cost savings from using SLs as part of freight journey, respectively.

**Table 2 Comparison between PDPTW-SL and PDPTW with Homogeneous Routing Costs.**

| Instance  | PDPTW-SL        |           |           |               |            |             | PDPTW           |           |               |            |
|-----------|-----------------|-----------|-----------|---------------|------------|-------------|-----------------|-----------|---------------|------------|
|           | $\underline{z}$ | $\bar{z}$ | # via SLs | # of vehicles | Time (sec) | Savings (%) | $\underline{z}$ | $\bar{z}$ | # of vehicles | Time (sec) |
| C6_2.4    | 369.36          | 369.36    | 5         | 3             | 0          | 20.00       | 461.70          | 461.70    | 3             | 0          |
| C7_2.4    | 390.31          | 390.31    | 6         | 3             | 0          | 15.97       | 464.49          | 464.49    | 3             | 0          |
| C8_2.4    | 446.35          | 446.35    | 5         | 4             | 21         | 7.68        | 483.50          | 483.50    | 3             | 0          |
| C9_2.4    | 471.16          | 471.16    | 7         | 4             | 146        | 5.43        | 498.19          | 498.19    | 3             | 0          |
| C10_2.4   | 510.01          | 510.01    | 4         | 4             | 55         | 1.02        | 515.25          | 515.25    | 3             | 0          |
| C11_2.4   | 522.85          | 522.85    | 4         | 4             | 27         | 0.35        | 524.69          | 524.69    | 3             | 0          |
| C12_2.4   | 541.60          | 541.60    | 5         | 4             | 4          | 9.51        | 598.55          | 598.55    | 3             | 0          |
| C15_2.6   | 649.93          | 649.93    | 8         | 4             | 21         | 10.25       | 724.12          | 724.12    | 4             | 1          |
| C20_2.8   | 751.23          | 751.23    | 2         | 5             | 69         | 5.45        | 794.53          | 794.53    | 5             | 2          |
| C25_2.8   | 879.94          | 879.94    | 11        | 5             | 1,215      | 18.27       | 1,076.71        | 1,076.71  | 6             | 20         |
| C40_2.8   | 1,202.13        | –         | –         | –             | 10,800     | –           | 1,428.59        | 1,428.59  | 8             | 1004       |
| RC6_2.4   | 572.76          | 572.76    | 1         | 3             | 0          | 13.09       | 658.99          | 658.99    | 4             | 0          |
| RC7_2.4   | 575.95          | 575.95    | 1         | 3             | 0          | 13.02       | 662.18          | 662.18    | 4             | 0          |
| RC8_2.4   | 585.32          | 585.32    | 1         | 3             | 1          | 11.74       | 663.16          | 663.16    | 4             | 0          |
| RC9_2.4   | 593.70          | 593.70    | 3         | 3             | 1          | 15.58       | 703.30          | 703.30    | 4             | 0          |
| RC10_2.4  | 599.95          | 599.95    | 3         | 3             | 1          | 15.45       | 709.55          | 709.55    | 4             | 0          |
| RC11_2.4  | 624.48          | 624.48    | 3         | 3             | 1          | 15.90       | 742.52          | 742.52    | 4             | 0          |
| RC12_2.6  | 662.03          | 662.03    | 3         | 4             | 1          | 16.66       | 794.42          | 794.42    | 5             | 0          |
| RC15_2.6  | 1,068.16        | 1,068.16  | 0         | 6             | 1          | 0.00        | 1,068.16        | 1,068.16  | 6             | 0          |
| RC20_2.8  | 1,200.36        | 1,200.36  | 4         | 7             | 3          | 16.48       | 1,437.13        | 1,437.13  | 7             | 4          |
| RC25_2.8  | 1,530.43        | 1,530.43  | 6         | 8             | 33         | 2.65        | 1,572.04        | 1,572.04  | 7             | 12         |
| RC40_2.12 | 1,969.45        | 1,969.45  | 2         | 10            | 682        | 3.16        | 2,033.66        | 2,033.66  | 10            | 73         |
| RC50_2.14 | 2,200.88        | 2,200.88  | 5         | 10            | 921        | 3.08        | 2,270.83        | 2,270.83  | 10            | 48         |
| RC60_2.16 | 2,636.22        | –         | –         | –             | 10,800     | –           | 2,682.66        | 2,682.66  | 12            | 1518       |
| R6_2.4    | 416.16          | 416.16    | 0         | 3             | 0          | 0.00        | 416.16          | 416.16    | 3             | 0          |
| R7_2.4    | 473.06          | 473.06    | 0         | 3             | 1          | 0.00        | 473.06          | 473.06    | 3             | 1          |
| R8_2.4    | 558.17          | 558.17    | 0         | 3             | 2          | 0.00        | 558.17          | 558.17    | 3             | 0          |
| R9_2.4    | 632.42          | 632.42    | 3         | 4             | 1          | 3.17        | 653.12          | 653.12    | 3             | 3          |
| R10_2.4   | 636.05          | 636.05    | 3         | 4             | 3          | 3.42        | 658.60          | 658.60    | 4             | 5          |
| R11_2.4   | 748.29          | 748.29    | 3         | 4             | 4          | 0.54        | 752.38          | 752.38    | 4             | 0          |
| R12_2.6   | 913.68          | 913.68    | 3         | 5             | 7          | 2.41        | 936.23          | 936.23    | 5             | 3          |
| R15_2.6   | 1,083.50        | 1,083.50  | 0         | 6             | 13         | 0.00        | 1,083.50        | 1,083.50  | 6             | 1          |
| R20_2.8   | 1,542.93        | 1,542.93  | 0         | 8             | 15         | 0.00        | 1,542.93        | 1,542.93  | 8             | 1          |
| R25_2.8   | 1,636.12        | 1,636.12  | 3         | 8             | 24         | 4.73        | 1,717.39        | 1,717.39  | 8             | 24         |
| R40_2.12  | 1,969.77        | 1,969.77  | 0         | 9             | 589        | 0.00        | 1,969.77        | 1,969.77  | 9             | 62         |
| R50_2.14  | 2,595.14        | 2,595.14  | 2         | 12            | 543        | 0.98        | 2,620.89        | 2,620.89  | 13            | 120        |
| R60_2.16  | 2,871.13        | –         | –         | –             | 10,800     | –           | 2,959.71        | 2,959.71  | 14            | 1158       |
| Average   |                 | 909.46    | 3.12      | 5.06          | 129.56     | 6.94        |                 | 965.88    | 5.12          | 11.18      |

Table 3 illustrates the results obtained after solving the proposed instances with heterogeneous routing costs. The minimum-capacity vehicle is assumed to cost 0.5 per operating time unit. Larger vehicles are assigned a cost that linearly increases with the carrying capacity. The columns are self-explanatory, similar to the previously presented table.

**Table 3 Comparison between PDPTW-SL and PDPTW with Heterogeneous Routing Costs.**

| Instance  | PDPTW-SL |           |           |               |            |             | PDPTW    |           |               |            |
|-----------|----------|-----------|-----------|---------------|------------|-------------|----------|-----------|---------------|------------|
|           | $z$      | $\bar{z}$ | # via SLs | # of vehicles | Time (sec) | Savings (%) | $z$      | $\bar{z}$ | # of vehicles | Time (sec) |
| C6_2.4    | 385.49   | 385.49    | 5         | 3             | 0          | 21.07       | 488.38   | 488.38    | 3             | 0          |
| C7_2.4    | 410.76   | 410.76    | 6         | 3             | 0          | 16.82       | 493.81   | 493.81    | 3             | 0          |
| C8_2.4    | 468.30   | 468.30    | 5         | 4             | 4          | 8.75        | 513.19   | 513.19    | 3             | 0          |
| C9_2.4    | 495.64   | 495.64    | 7         | 4             | 186        | 6.25        | 528.70   | 528.70    | 3             | 0          |
| C10_2.4   | 535.01   | 535.01    | 4         | 4             | 100        | 2.14        | 546.71   | 546.71    | 3             | 0          |
| C11_2.4   | 548.55   | 548.55    | 4         | 4             | 16         | 1.46        | 556.67   | 556.67    | 3             | 0          |
| C12_2.4   | 568.30   | 568.30    | 5         | 4             | 4          | 9.46        | 627.67   | 627.67    | 3             | 1          |
| C15_2.6   | 980.46   | 980.46    | 8         | 5             | 67         | 18.81       | 1,207.67 | 1,207.67  | 4             | 9          |
| C20_2.8   | 890.02   | 890.02    | 6         | 4             | 91         | 15.49       | 1,053.12 | 1,053.12  | 5             | 91         |
| C25_2.8   | 1,330.48 | 1,330.48  | 13        | 6             | 5,452      | 20.64       | 1,676.53 | 1,676.53  | 6             | 20         |
| C40_2.8   | 1,441.80 | –         | –         | –             | 10,800     | –           | 1,800.52 | 1,800.52  | 8             | 3,417      |
| RC6_2.4   | 593.52   | 593.52    | 1         | 3             | 0          | 13.66       | 687.39   | 687.39    | 4             | 0          |
| RC7_2.4   | 596.89   | 596.89    | 1         | 3             | 0          | 13.59       | 690.76   | 690.76    | 4             | 0          |
| RC8_2.4   | 606.78   | 606.78    | 1         | 3             | 0          | 12.28       | 691.73   | 691.73    | 4             | 0          |
| RC9_2.4   | 615.50   | 615.50    | 3         | 3             | 1          | 15.90       | 731.87   | 731.87    | 4             | 0          |
| RC10_2.4  | 621.75   | 621.75    | 3         | 3             | 1          | 15.81       | 738.47   | 738.47    | 4             | 1          |
| RC11_2.4  | 646.28   | 646.28    | 3         | 3             | 1          | 16.42       | 773.28   | 773.28    | 4             | 0          |
| RC12_2.6  | 693.75   | 693.75    | 3         | 4             | 1          | 15.72       | 823.19   | 823.19    | 5             | 0          |
| RC15_2.6  | 1,586.84 | 1,586.84  | 0         | 6             | 1          | 1.44        | 1,610.10 | 1,610.10  | 6             | 1          |
| RC20_2.8  | 1,639.68 | 1,639.68  | 4         | 7             | 7          | 18.89       | 2,021.58 | 2,021.58  | 7             | 6          |
| RC25_2.8  | 2,403.87 | 2,403.87  | 6         | 8             | 25         | 4.16        | 2,508.24 | 2,508.24  | 7             | 13         |
| RC40_2.12 | 3,145.84 | 3,145.84  | 1         | 10            | 10,768     | 3.19        | 3,249.36 | 3,249.36  | 10            | 59         |
| RC50_2.14 | 3,442.28 | 3,442.28  | 5         | 10            | 5,048      | 6.03        | 3,663.11 | 3,663.11  | 10            | 43         |
| RC60_2.16 | 4,024.96 | –         | –         | –             | 10,800     | –           | 4,077.43 | 4,077.43  | 13            | 1,103      |
| R6_2.4    | 416.16   | 416.16    | 0         | 3             | 0          | 0.00        | 416.16   | 416.16    | 3             | 0          |
| R7_2.4    | 473.06   | 473.06    | 0         | 3             | 1          | 0.00        | 473.06   | 473.06    | 3             | 1          |
| R8_2.4    | 558.17   | 558.17    | 0         | 3             | 2          | 0.00        | 558.17   | 558.17    | 3             | 0          |
| R9_2.4    | 632.42   | 632.42    | 3         | 4             | 4          | 3.17        | 653.12   | 653.12    | 3             | 1          |
| R10_2.4   | 636.05   | 636.05    | 3         | 4             | 5          | 3.42        | 658.60   | 658.60    | 4             | 1          |
| R11_2.4   | 748.29   | 748.29    | 3         | 4             | 3          | 0.54        | 752.38   | 752.38    | 4             | 0          |
| R12_2.6   | 946.53   | 946.53    | 3         | 5             | 7          | 2.46        | 970.42   | 970.42    | 5             | 5          |
| R15_2.6   | 1,377.04 | 1,377.04  | 0         | 6             | 18         | 0.00        | 1,377.04 | 1,377.04  | 6             | 3          |
| R20_2.8   | 1,839.34 | 1,839.34  | 1         | 8             | 132        | 0.05        | 1,840.22 | 1,840.22  | 7             | 1          |
| R25_2.8   | 2,011.86 | 2,011.86  | 1         | 8             | 27         | 5.80        | 2,135.65 | 2,135.65  | 8             | 35         |
| R40_2.12  | 2,518.05 | 2,518.05  | 0         | 9             | 329        | 1.80        | 2,564.27 | 2,564.27  | 9             | 108        |
| R50_2.14  | 3,182.19 | 3,182.19  | 2         | 12            | 2,684      | 1.40        | 3,227.26 | 3,227.26  | 13            | 466        |
| R60_2.16  | 3,479.13 | –         | –         | –             | 10,800     | –           | 3,628.98 | 3,628.98  | 14            | 663        |
| Average   |          | 1,133.68  | 3.24      | 5.09          | 734.85     | 8.14        |          | 1,220.82  | 5.09          | 25.44      |

Table 4 indicates the results obtained when solving the instances with up to three SLs. The average is computed over all instances that we optimally solved in all SL configurations. As expected, multiple SLs lead to more savings compared to corresponding PDPTW solutions. In particular, 2-SLs and 3-SLs cases led to cost savings of 4.58%, and 8.39% respectively. It is important to note that the cost savings are mainly obtained from using available capacities, thus minimizing the total traveling time of the PD vehicles. In addition, the average number of vehicles used did not significantly change compared to the classical system.

**Table 4 The Effect of Multiple Available SLs.**

| Instance  | One SL (sl=2) |               |           |            | Two SLs (sl=4) |               |           |            | Three SLs (sl=6) |               |           |            |
|-----------|---------------|---------------|-----------|------------|----------------|---------------|-----------|------------|------------------|---------------|-----------|------------|
|           | $\bar{z}$     | # of vehicles | # via SLs | Time (sec) | $\bar{z}$      | # of vehicles | # via SLs | Time (sec) | $\bar{z}$        | # of vehicles | # via SLs | Time (sec) |
| C6.2.4    | 369.36        | 3             | 5         | 0          | 369.36         | 3             | 5         | 1          | 310.85           | 3             | 8         | 2,437      |
| C7.2.4    | 390.31        | 3             | 6         | 0          | 381.21         | 3             | 6         | 104        | 313.41           | 3             | 9         | 4,890      |
| C8.2.4    | 446.35        | 4             | 5         | 21         | 415.84         | 3             | 5         | 229        | –                | –             | –         | 10,800     |
| C9.2.4    | 471.16        | 4             | 7         | 146        | 459.98         | 4             | 7         | 3,731      | –                | –             | –         | 10,800     |
| RC6.2.4   | 572.76        | 3             | 1         | 0          | 572.76         | 3             | 1         | 0          | 520.11           | 4             | 4         | 0          |
| RC7.2.4   | 575.95        | 3             | 1         | 0          | 575.95         | 3             | 1         | 0          | 539.08           | 4             | 4         | 0          |
| RC8.2.4   | 585.32        | 3             | 1         | 1          | 585.32         | 3             | 1         | 1          | 548.45           | 4             | 4         | 1          |
| RC9.2.4   | 593.70        | 3             | 3         | 1          | 593.70         | 3             | 3         | 1          | 552.71           | 4             | 6         | 1          |
| RC10.2.4  | 599.95        | 3             | 3         | 1          | 599.95         | 3             | 3         | 1          | 558.96           | 4             | 6         | 1          |
| RC11.2.4  | 624.48        | 3             | 3         | 1          | 624.48         | 3             | 3         | 2          | 585.72           | 4             | 7         | 2          |
| RC12.2.6  | 662.03        | 4             | 3         | 1          | 662.03         | 4             | 3         | 2          | 619.59           | 4             | 7         | 2          |
| RC15.2.6  | 1,068.16      | 6             | 0         | 1          | 1,059.38       | 6             | 1         | 3          | 1,059.38         | 6             | 1         | 3          |
| RC20.2.8  | 1,200.36      | 7             | 4         | 3          | 1,127.02       | 8             | 8         | 1,128      | 1,127.02         | 8             | 8         | 1,389      |
| RC25.2.8  | 1,530.43      | 8             | 6         | 33         | 1,388.18       | 7             | 8         | 34         | 1,371.47         | 7             | 14        | 1,641      |
| RC40.2.12 | 1,969.45      | 10            | 2         | 682        | –              | –             | –         | 10,800     | –                | –             | –         | 10,800     |
| R6.2.4    | 416.16        | 3             | 0         | 0          | 416.16         | 3             | 0         | 0          | 416.16           | 3             | 0         | 0          |
| R7.2.4    | 473.06        | 3             | 0         | 1          | 473.06         | 3             | 0         | 2          | 470.15           | 3             | 1         | 7          |
| R8.2.4    | 558.17        | 3             | 0         | 2          | 535.27         | 4             | 1         | 3          | 490.77           | 3             | 2         | 3          |
| R9.2.4    | 632.42        | 4             | 3         | 1          | 579.38         | 4             | 3         | 1          | 579.38           | 4             | 3         | 1          |
| R10.2.4   | 636.05        | 4             | 3         | 3          | 584.89         | 4             | 3         | 1          | 584.89           | 4             | 3         | 2          |
| R11.2.4   | 748.29        | 4             | 3         | 4          | 687.36         | 4             | 3         | 1          | 687.36           | 4             | 3         | 2          |
| R12.2.6   | 913.68        | 5             | 3         | 7          | 858.33         | 5             | 4         | 889        | 822.64           | 5             | 5         | 43         |
| R15.2.6   | 1,083.50      | 6             | 0         | 13         | 1,023.99       | 6             | 3         | 28         | 921.56           | 6             | 6         | 884        |
| R20.2.8   | 1,542.93      | 8             | 0         | 15         | 1,425.42       | 8             | 3         | 105        | 1,378.70         | 7             | 8         | 5,738      |
| R25.2.8   | 1,636.12      | 8             | 3         | 24         | 1,495.46       | 8             | 9         | 20         | 1,493.46         | 8             | 7         | 78         |
| R40.2.12  | 1,969.77      | 9             | 0         | 589        | 1,922.00       | 9             | 4         | 346        | –                | –             | –         | 10,800     |
